# Supplementary material for: Modulating the electronic properties and band alignments of the arsenene/MoSi2N4 van der Waals heterostructure via applying strain and electric field
Source: Royal Society of Chemistry journal article supplement (doi:10.1039/d3cp04877b), 2023-01-01
Supplement: d3cp04877b1.pdf [file d3cp04877b1.pdf]

# Modulating electronic properties and band alignments of arsenene/MoSi<sub>2</sub>N<sub>4</sub> van der Waals heterostructure via strain and electric field

Jun Zhao<sup>†,\*</sup>, Yunxi Qi<sup>†</sup>, and Can Yao<sup>†</sup>

<sup>†</sup>*New Energy Technology Engineering Laboratory of Jiangsu Province & School of Science, Nanjing University of Posts and Telecommunications, Nanjing, Jiangsu 210023, China*

Hui Zeng<sup>\*</sup>

<sup>‡</sup>*School of Microelectronics, Nanjing University of Science and Technology, Nanjing, Jiangsu 210094, China*

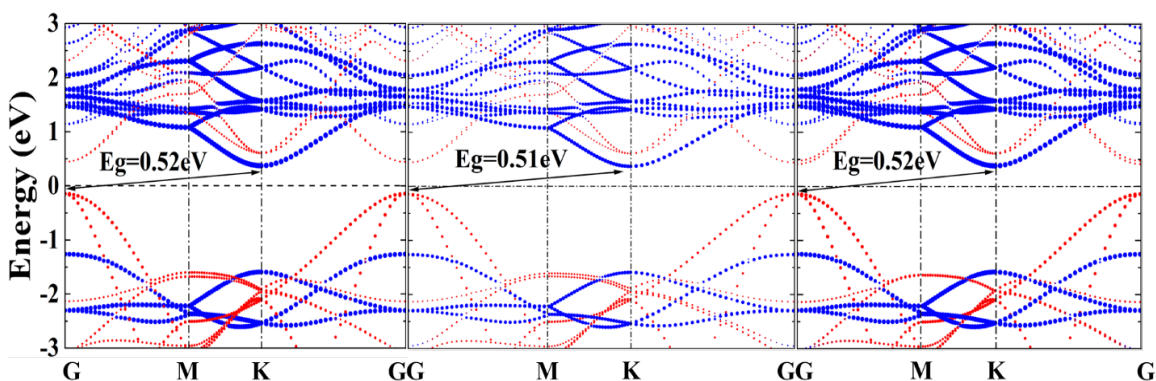

**Fig. S1** The projected electronic structures of the arsenene/MoSi<sub>2</sub>N<sub>4</sub> heterostructure with A<sub>1</sub>, A<sub>2</sub>, and A<sub>3</sub> stackings (from left to right). The blue color and red color represent the contributions given by the MoSi<sub>2</sub>N<sub>4</sub> sublayer and the arsenene sublayer, respectively.

\* Authors to whom correspondence should be addressed: [zhaojun@njupt.edu.cn](mailto:zhaojun@njupt.edu.cn) (J.Z) and [zenghui@njupt.edu.cn](mailto:zenghui@njupt.edu.cn) (H.Z)

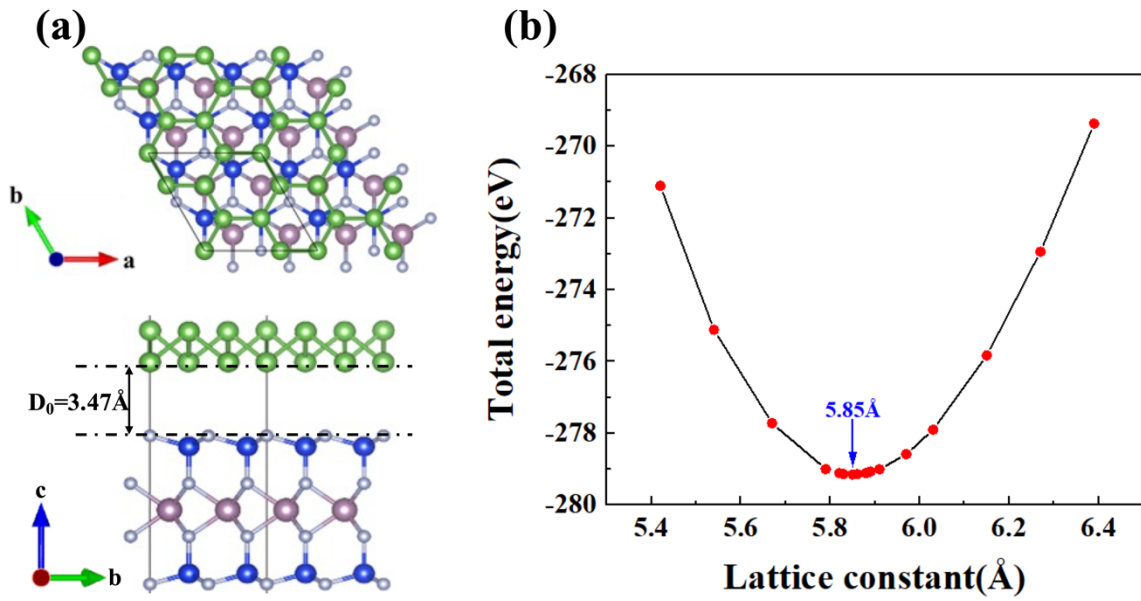

**Fig. S2** The atomic structure of (a) the arsenene/MoSi<sub>2</sub>N<sub>4</sub> heterostructure with in-plane lattice constant of 5.85 (Å) and (b) the total energy of the heterostructure as a function of different in-plane lattice constants.

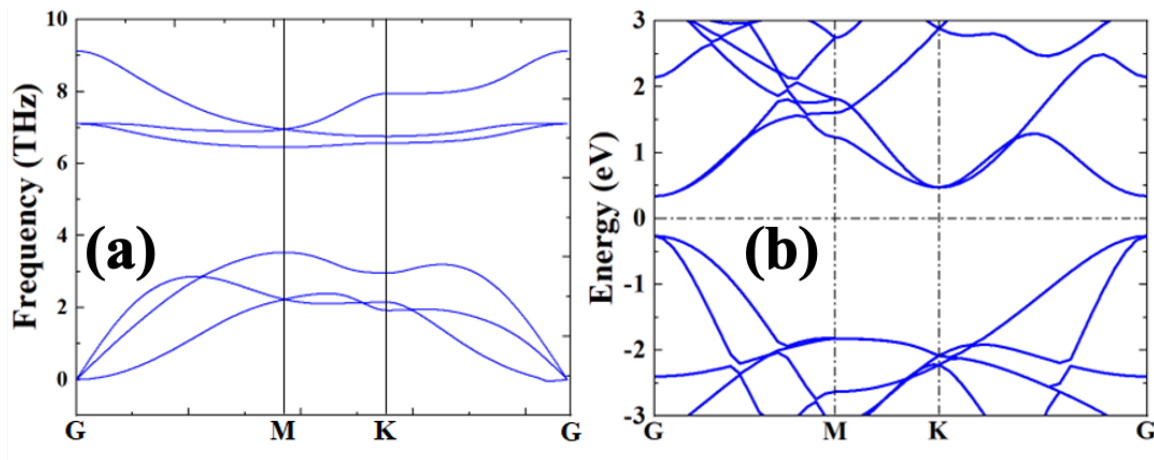

**Fig. S3** The (a) electronic structure and the (b) phonon spectrum of the monolayered arsenene supercell with  $\sqrt{3} \times \sqrt{3}$  unit cells and its lattice constants are set to  $a=b=5.85$  Å.

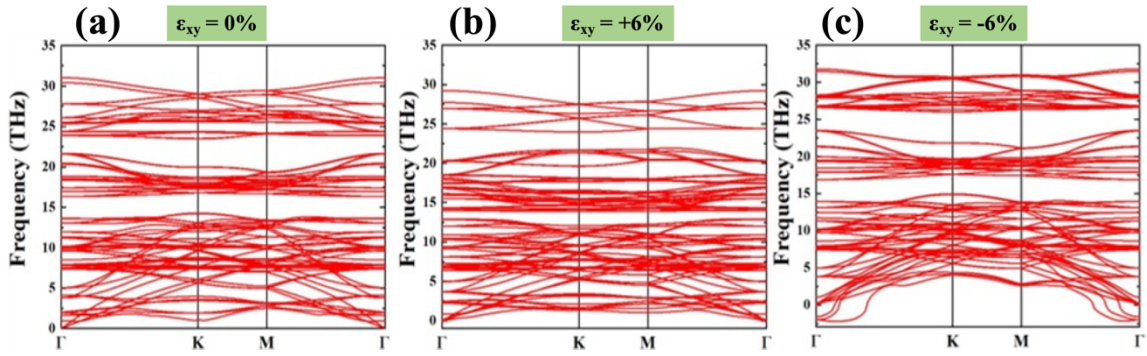

**Fig. S4** Phonon spectral of the arsenene/MoSi<sub>2</sub>N<sub>4</sub> heterostructure under different in-plane strains when (a)  $\varepsilon_{xy} = 0\%$ , (b)  $\varepsilon_{xy} = 6\%$ , and (c)  $\varepsilon_{xy} = -6\%$ , respectively.

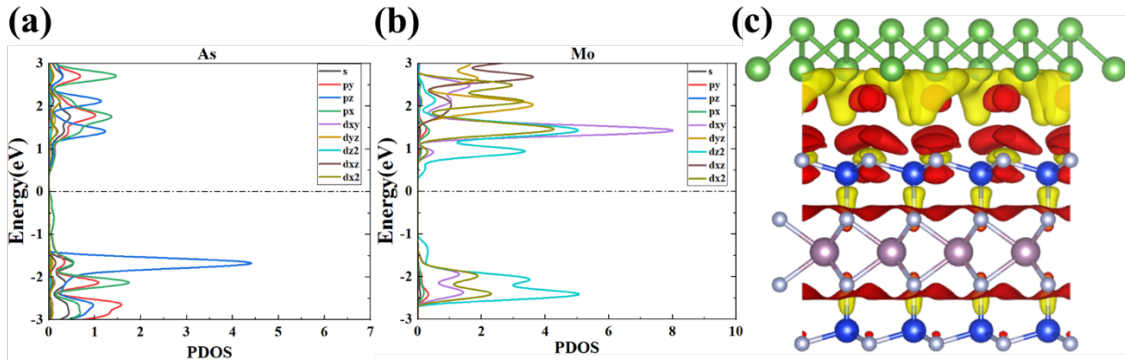

**Fig. S5** Orbital projected density of states (DOS) of the arsenene/MoSi<sub>2</sub>N<sub>4</sub> heterostructure with all orbitals, including *s*-, *p*-, and *d*-orbitals for (a) As atoms and (b) Mo atoms. (c) The charge density difference of the arsenene/MoSi<sub>2</sub>N<sub>4</sub> heterostructure with isosurface cutoff of  $0.0001 \text{ e}/\text{\AA}^3$ , and the electron depletion and accumulation are labelled by red and yellow colors, respectively.

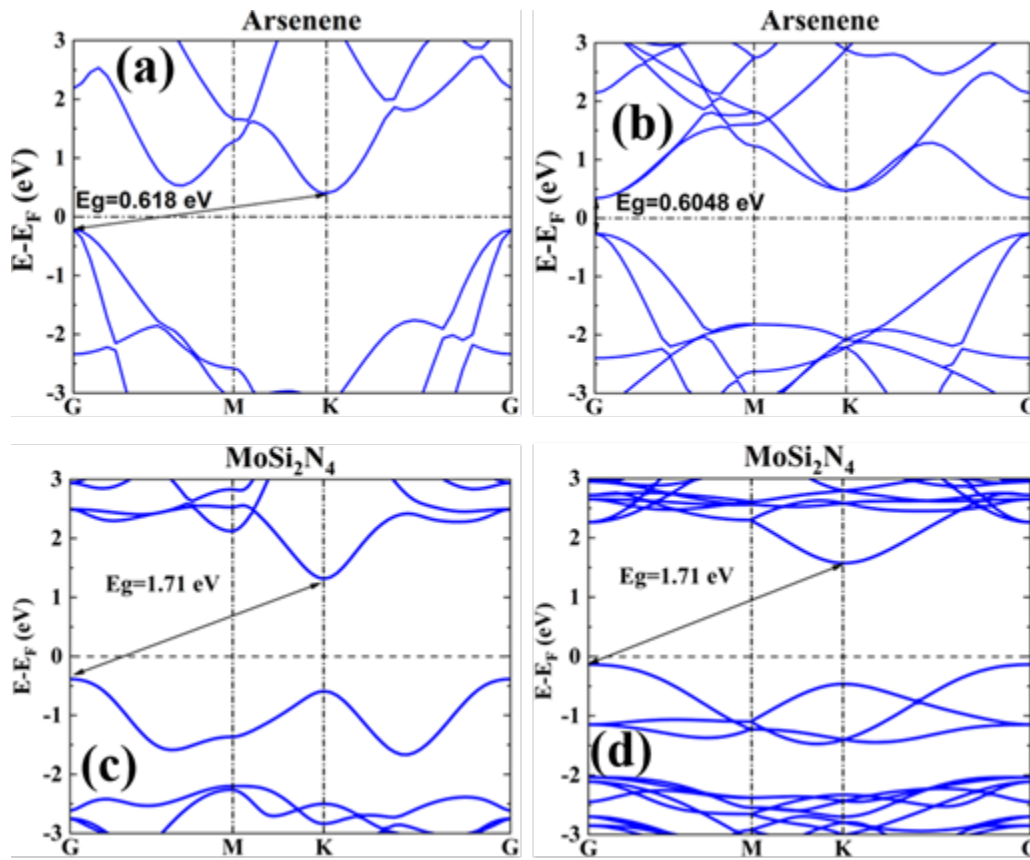

**Fig. S6** The electronic structures of the arsenene monolayer with (a) 1 primitive cell and (b)  $\sqrt{3} \times \sqrt{3}$  supercell. The electronic structures of the MoSi<sub>2</sub>N<sub>4</sub> monolayer with (c) 1 primitive cell and (d) 2×2 supercell.

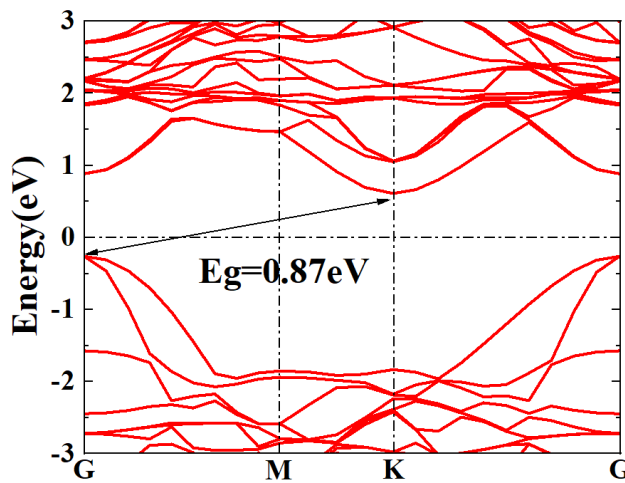

**Fig. S7** HSE06 functional calculation of electronic band structure of the arsenene/MoSi<sub>2</sub>N<sub>4</sub> heterostructure.

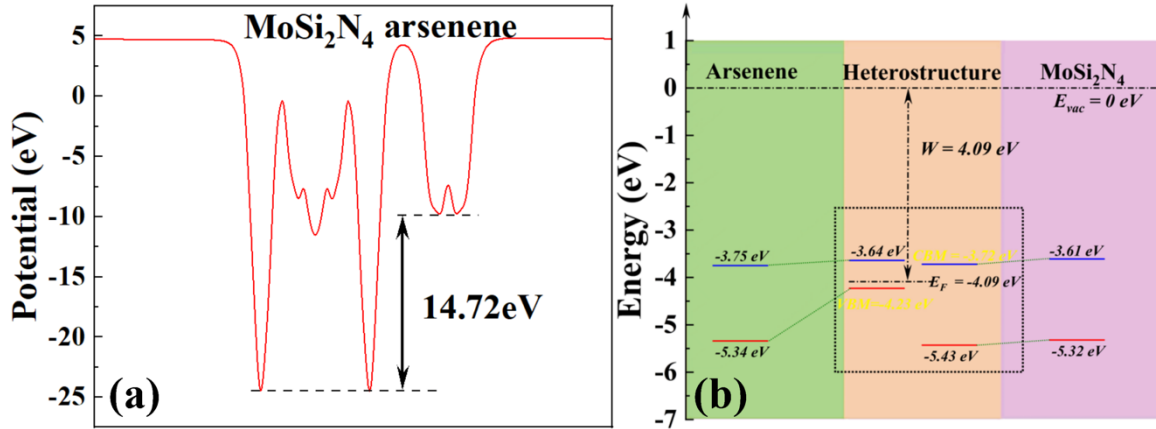

**Fig. S8** The (a) plane-averaged electrostatic potential along  $z$  direction and the (b) band edge evolution of the two sublayers and the band edge of the arsenene/MoSi<sub>2</sub>N<sub>4</sub> heterostructure. The band alignment of the vdW heterostructure is highlighted by black dotted square, and its band edges are denoted by yellow color.

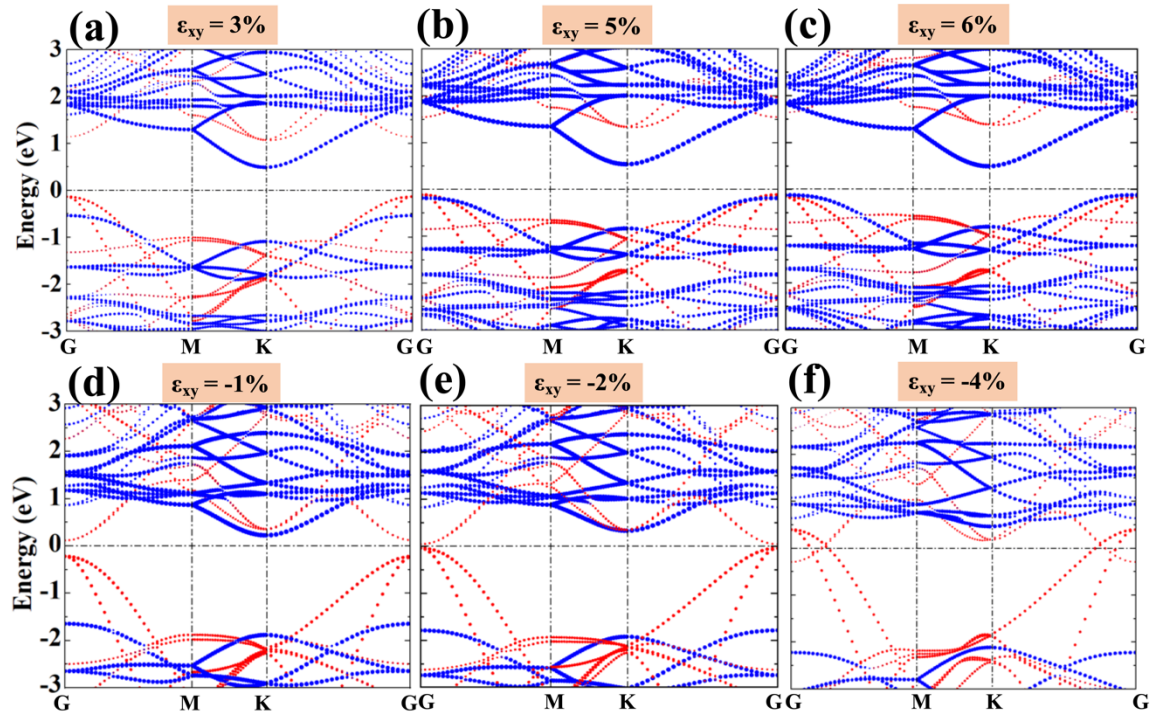

**Fig. S9** The projected band structures of the arsenene/MoSi<sub>2</sub>N<sub>4</sub> heterostructure under different in-plane biaxial strains. Red color and blue color represent the contributions of the arsenene monolayer and the MoSi<sub>2</sub>N<sub>4</sub> monolayer, respectively.



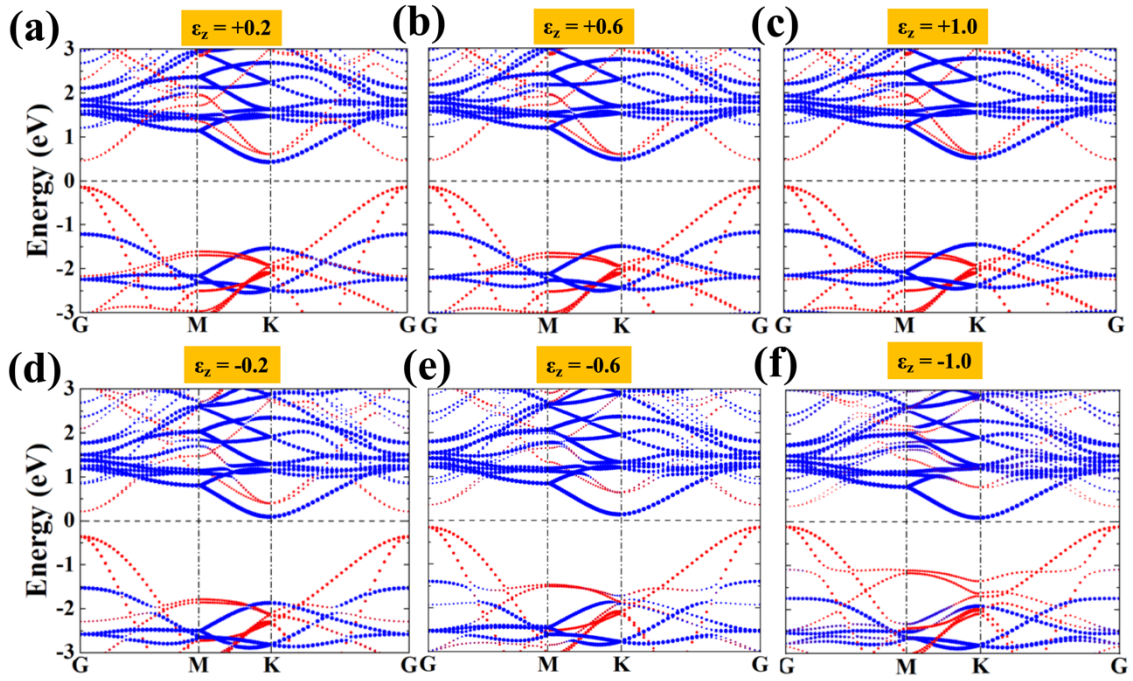

**Fig. S10** The projected band structures of the arsenene/MoSi<sub>2</sub>N<sub>4</sub> heterostructure under different vertical strains. Red color and blue color represent the contributions of the arsenene monolayer and the MoSi<sub>2</sub>N<sub>4</sub> monolayer, respectively.

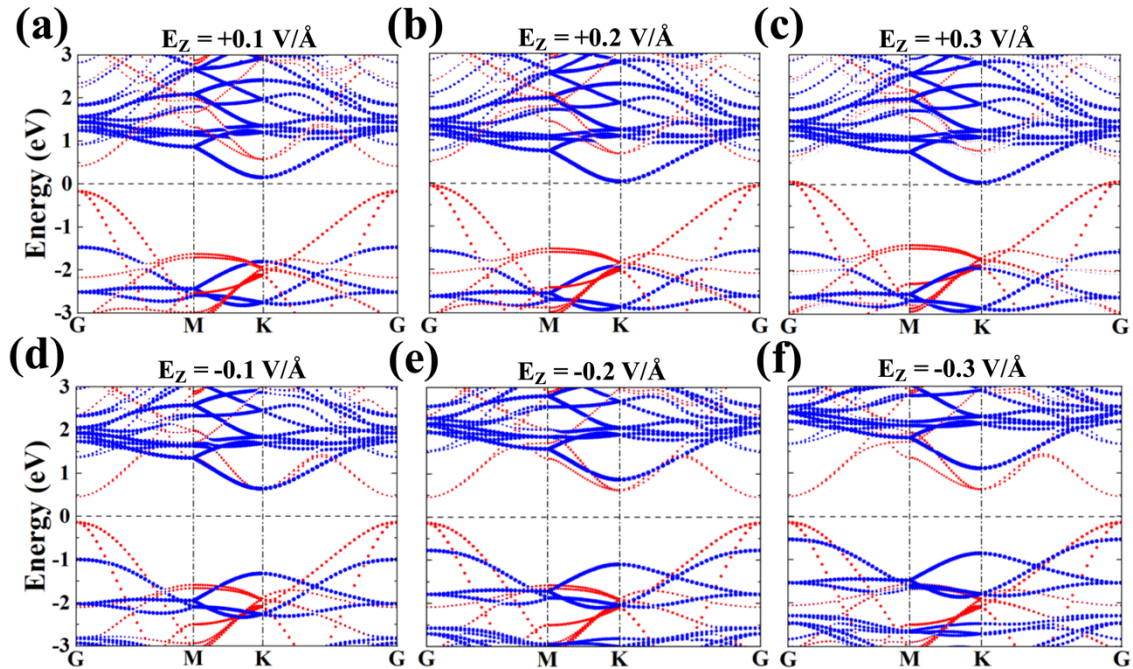

**Fig. S11** The projected band structures of the arsenene/MoSi<sub>2</sub>N<sub>4</sub> heterostructure under

different external electric fields. Red color and blue color represent the contributions of the arsenene monolayer and the MoSi<sub>2</sub>N<sub>4</sub> monolayer, respectively.

Table S1 Lattice constants  $a$  and  $b$ , equilibrium distance  $D_0$  between the two monolayers, bandgap  $E_g$ , total energy  $E_t$  and binding energy  $E_b$  for different stacking structures.

| Stackings      | $a = b$ (Å) | $D_0$ (Å) | $E_g$ (eV) | $E_t$ (eV) | $E_b$ (eV) |
|----------------|-------------|-----------|------------|------------|------------|
| A <sub>1</sub> | 5.85        | 3.47      | 0.5159     | -279.1501  | -0.5688    |
| A <sub>2</sub> | 5.85        | 3.46      | 0.5133     | -279.1496  | -0.5670    |
| A <sub>3</sub> | 5.85        | 3.50      | 0.5229     | -279.1489  | -0.5659    |
